# Supplementary material
Source: HighWire-hosted journal article supplement (https://bmjopen.bmj.com/content/11/10/e054751)
Supplement: inline-supplementary-material-2 [file inline-supplementary-material-2.pdf]

## Appendix B. Search Strategies for Scoping Review

Database: Ovid MEDLINE(R) and Epub Ahead of Print, In-Process, In-Data-Review & Other Non-Indexed Citations, Daily and Versions(R) <1946 to July 01, 2021> Search Strategy:

- 
- 1 measurement based care.mp. (297)
  - 2 feedback informed treatment.mp. (16)
  - 3 (routine\* adj2 monitor\* adj2 (client\* or progress\*)).mp. (20)
  - 4 "outcome\* monitoring and feedback".mp. (9)
  - 5 patient\* focused research.mp. (44)
  - 6 patient\* level feedback.mp. (8)
  - 7 patient\* reported outcome\* measure\*.mp. (15242)
  - 8 routine outcome\* monitoring.mp. (255)
  - 9 or/1-8 (15828)
  - 10 exp Education, Professional/ (309937)
  - 11 (educat\* or train\* or mentor\* or teach\* or preceptor\* or coach\* or instruct\*).ti,hw,kf. (841831)
  - 12 or/10-11 (862698)
  - 13 9 and 12 (359)
  - 14 limit 13 to english language (358)

\*\*\*\*\*

Database: Embase Classic+Embase <1947 to 2021 Week 25> Search Strategy:

- 
- 1 measurement based care.mp. (372)
  - 2 feedback informed treatment.mp. (19)
  - 3 (routine\* adj2 monitor\* adj2 (client\* or progress\*)).mp. (27)
  - 4 "outcome\* monitoring and feedback".mp. (9)
  - 5 patient\* focused research.mp. (74)
  - 6 patient\* level feedback.mp. (11)
  - 7 patient\* reported outcome\* measure\*.mp. (13570)
  - 8 routine outcome\* monitoring.mp. (315)
  - 9 or/1-8 (14342)
  - 10 exp medical education/ (354082)
  - 11 exp nursing education/ (90739)
  - 12 exp paramedical education/ (98170)
  - 13 exp allied health education/ (319)

- 14 (educat\* or train\* or mentor\* or teach\* or preceptor\* or coach\* or instruct\*).ti,hw,kw.  
(1530136)
- 15 or/10-14 (1557538)
- 16 9 and 15 (855)
- 17 limit 16 to english language (850)

\*\*\*\*\*

Database: EBM Reviews - Cochrane Central Register of Controlled Trials <May 2021> Search Strategy:

- 
- 1 measurement based care.mp. (60)
  - 2 feedback informed treatment.mp. (12)
  - 3 (routine\* adj2 monitor\* adj2 (client\* or progress\*)).mp. (4)
  - 4 "outcome\* monitoring and feedback".mp. (6)
  - 5 patient\* focused research.mp. (6)
  - 6 patient\* level feedback.mp. (5)
  - 7 patient\* reported outcome\* measure\*.mp. (2520)
  - 8 routine outcome\* monitoring.mp. (36)
  - 9 or/1-8 (2644)
  - 10 exp Education, Professional/ (4848)
  - 11 (educat\* or train\* or mentor\* or teach\* or preceptor\* or coach\* or instruct\*).ti,hw.  
(111426)
  - 12 or/10-11 (111809)
  - 13 9 and 12 (196)
  - 14 limit 13 to english language (178)

\*\*\*\*\*

Database: APA PsycInfo <1806 to June Week 4 2021> Search Strategy:

- 
- 1 measurement based care.mp. (247)
  - 2 feedback informed treatment.mp. (53)
  - 3 (routine\* adj2 monitor\* adj2 (client\* or progress\*)).mp. (17)
  - 4 "outcome\* monitoring and feedback".mp. (12)
  - 5 patient\* focused research.mp. (75)
  - 6 patient\* level feedback.mp. (2)
  - 7 exp patient reported outcome measures/ (393)
  - 8 patient\* reported outcome\* measure\*.mp. (2197)

- 9 routine outcome\* monitoring.mp. (317)  
 10 or/1-9 (2859)  
 11 exp medical education/ (24932)  
 12 exp nursing education/ (6436)  
 13 exp paraprofessional education/ (688)  
 14 exp Education/ (444504)  
 15 exp Educational Programs/ (93862)  
 16 (educat\* or train\* or mentor\* or teach\* or preceptor\* or coach\* or instruct\*).ti,hw,id.  
 (630008)  
 17 or/11-16 (719210)  
 18 10 and 17 (139)  
 19 limit 18 to english language (137)

\*\*\*\*\*

Cinahl Search Strategy. Search done on July 2, 2021.

| Search ID# | Search Terms                                                                     | Search Options                                                                                        | Results |
|------------|----------------------------------------------------------------------------------|-------------------------------------------------------------------------------------------------------|---------|
| S14        | S9 AND S13                                                                       | Limiters - English Language<br>Expanders - Apply equivalent subjects<br>Search modes - Boolean/Phrase | 189     |
| S13        | S10 OR S11 OR S12                                                                | Expanders - Apply equivalent subjects<br>Search modes - Boolean/Phrase                                | 729,440 |
| S12        | MW (educat* or train* or mentor* or teach* or preceptor* or coach* or instruct*) | Expanders - Apply equivalent subjects<br>Search modes - Boolean/Phrase                                | 654,336 |
| S11        | TI (educat* or train* or mentor* or teach* or preceptor* or coach* or instruct*) | Expanders - Apply equivalent subjects<br>Search modes - Boolean/Phrase                                | 240,690 |
| S10        | (MH "Education, Health Sciences+")                                               | Expanders - Apply equivalent subjects<br>Search modes - Boolean/Phrase                                | 283,979 |
| S9         | S1 OR S2 OR S3 OR S4 OR S5 OR S6 OR S7 OR S8                                     | Expanders - Apply equivalent subjects<br>Search modes - Boolean/Phrase                                | 4,782   |

|    |                                                   |                                                                        |       |
|----|---------------------------------------------------|------------------------------------------------------------------------|-------|
| S8 | TX routine outcome monitoring                     | Expanders - Apply equivalent subjects<br>Search modes - Boolean/Phrase | 114   |
| S7 | TX patient* reported outcome measure*             | Expanders - Apply equivalent subjects<br>Search modes - Boolean/Phrase | 4,503 |
| S6 | TX patient* level feedback                        | Expanders - Apply equivalent subjects<br>Search modes - Boolean/Phrase | 5     |
| S5 | TX patient* focused research                      | Expanders - Apply equivalent subjects<br>Search modes - Boolean/Phrase | 19    |
| S4 | TX "outcome monitoring and feedback"              | Expanders - Apply equivalent subjects<br>Search modes - Boolean/Phrase | 4     |
| S3 | TX (routine* N2 monitor* N2 client* N2 progress*) | Expanders - Apply equivalent subjects<br>Search modes - Boolean/Phrase | 1     |
| S2 | TX feedback informed treatment                    | Expanders - Apply equivalent subjects<br>Search modes - Boolean/Phrase | 6     |
| S1 | TX measurement based care                         | Expanders - Apply equivalent subjects<br>Search modes - Boolean/Phrase | 140   |
